# Supplementary material for: Mechanostress-induced DNA damage in migrating neurons during brain development
Source: Research Square preprint supplement (doi:10.21203/rs.3.rs-6836425/v1), 2025-06-23
Supplement: Supplementary file 1 [file 66c074e1b9ae79b4f5f7c23e.docx]

**Legends for Supplementary Videos**

**Supplementary Video 1 | Transient 53BP1 foci formation in CGNs migrating in cerebellar slice culture**
Live imaging of CGNs undergoing radial migration from the EGL to the ML in cerebellar slice culture. Cells were electroporated with 53BP1-mNG and mScarlet at P5 and dissected for organotypic culture at P7. *Left*, single channel view for 53BP1-mNG; *Right,* merged view (mScarlet in magenta and 53BP1-mNG in green). Time-lapse was acquired every 10 min using FV1000. Images are maximum intensity projections of xy planes separated by 10 μm steps, capturing the entire depth of the migrating cells. Scale bar, 5 μm.

**Supplementary Video 2 | Transient 53BP1 foci formation in CGNs migrating through 3-μm microchannels**
Dissociated CGNs electroporated with 53BP1-mNG and mScarlet were plated on the micropatterned substrate with 3 x 5 µm2 constrictions. *Left*, single channel view for 53BP1-mNG; *Right,* merged view (mScarlet in magenta and 53BP1-mNG in green). Time-lapse was acquired every 5 min using CV1000. Images are maximum intensity projections of xy planes separated by 1 μm steps, capturing the entire depth of the migrating cells. Scale bar, 5 μm.

**Supplementary Video 3 | Transient 53BP1 foci formation in cortical neurons migrating in cortical slice culture**
Live imaging of cortical neurons migrating through the cortical plate in a brain slice culture. Cells were electroporated with 53BP1-mNG at E12 and dissected at E14 for slice culture. Time-lapse was acquired every 10 min using FV1000. Images are maximum intensity projections of xy planes separated by 10 μm steps, capturing the entire depth of the migrating cells. Scale bar, 5 μm.

**Supplementary Video 4 | Nuclear rupture in HeLa cells migrating through 3-μm microchannels**
Live imaging of HeLa cells transfected with mNG-NLS (green) and mScarlet (magenta) migrating through 3 x 5 µm2 microchannels. *Left*, single channel view for mNG-NLS; *Right,* merged view of mNG-NLS and mScarlet. The cell exhibits repetitive nuclear ruptures during passage through narrow channels, visualized by transient escape of mNG-NLS from the nucleus into the cytoplasm. Time-lapse was acquired every 5 min using CV1000. Images are maximum intensity projections of xy planes separated by 1 μm steps, capturing the entire depth of the migrating cells. Scale bar, 5 μm.

**Supplementary Video 5 | Nuclear rupture does not occur in CGNs migrating through 3-μm microchannels**
Live imaging of dissociated CGNs expressing mNG-NLS (green) and mScarlet (magenta) in the micropatterned substrate with repetitive 3 x 5 µm2 microchannels. *Left*, single channel view for mNG-NLS; *Right,* merged view of mNG-NLS and mScarlet. Unlike in HeLa cells, mNG-NLS signal remains in the nucleus during passage through narrow channels. Time-lapse was acquired every 5 min using CV1000. Images are maximum intensity projections of xy planes separated by 1 μm steps, capturing the entire depth of the migrating cells. Scale bar, 5 μm.

**Supplementary Video 6 | Walking behaviors of control and *Lig4 ND1-Cre* mice**
A control mouse (top) and a *Lig4 ND1-Cre* mouse (bottom) at 12 mo walking on a flat runway.

**Supplementary Video 7 | Balance beam performance in control and *Lig4 ND1-Cre* mice**
Representative images a control mouse (top) and a *Lig4 ND1-Cre* mouse (bottom) at 11 mo walking across a round beam at height.
